# Supplementary material
Source: publisher site journal article supplement (https://www.dovepress.com/article/372477)
Supplement: Supplementary file 2 [file Supplementary_Figure_2_Maximum_concentration_of_total_paclitaxel_with_NK105.pdf › Supplementary_Figure_2_Maximum_concentration_of_total_paclitaxel_with_NK105.pdf]

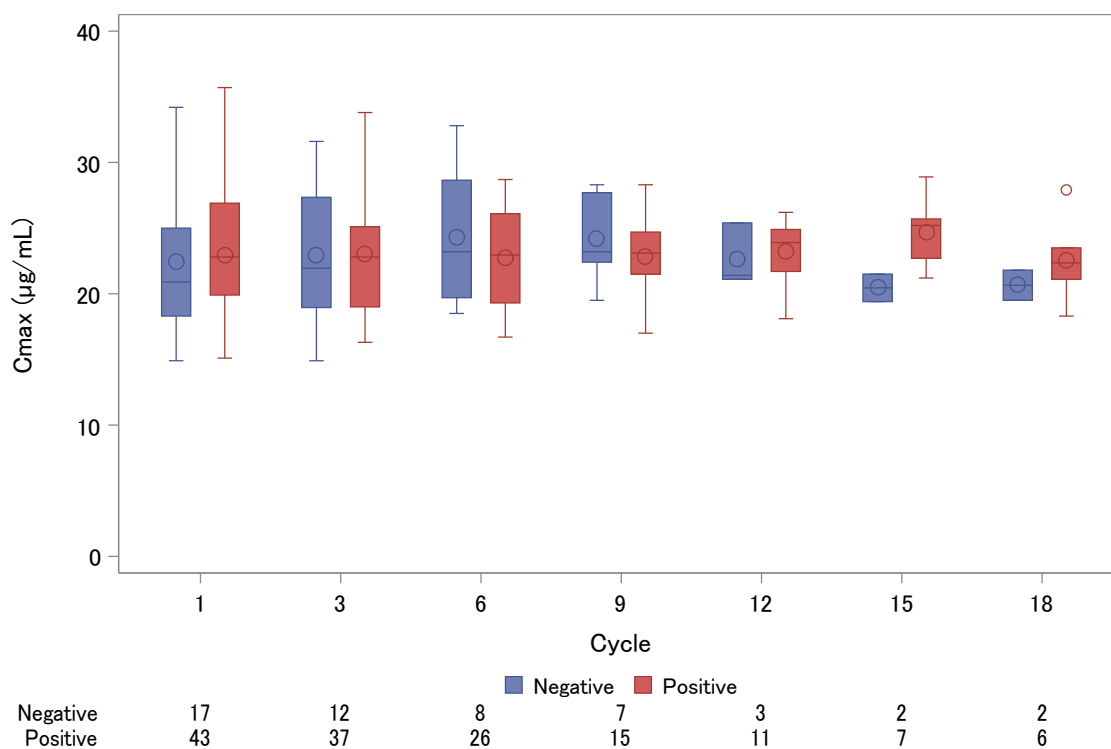

Supplementary Figure 2 Maximum concentration of total paclitaxel with NK105 (both micelle-incorporated paclitaxel and released paclitaxel).  
Notes: The plasma concentrations of total PTX were determined by liquid chromatography/tandem mass spectrometry (LC-MS/MS). The bottom and top of the box are the first quartile (Q1) and the third quartile (Q3), and the band inside the box is the median. The boundaries of the whiskers are found within the 1.5\*interquartile (IQR), where IQR is calculated as Q3-Q1. The small circles and the plus symbols within the boxes indicate the arithmetic means and symbols outside the boxes indicate data points outside the range from Q1-1.5\*IQR to Q3+1.5\*IQR. The bottom whisker represents the minimum and the upper whisker represents the maximum.  
Abbreviations: C<sub>max</sub>, maximum concentration; Negative, Negative for anti-PEG antibodies; Positive, Positive for anti-PEG antibodies; PTX, paclitaxel.
