# Supplementary material
Source: publisher site journal article supplement (https://www.dovepress.com/article/372477)

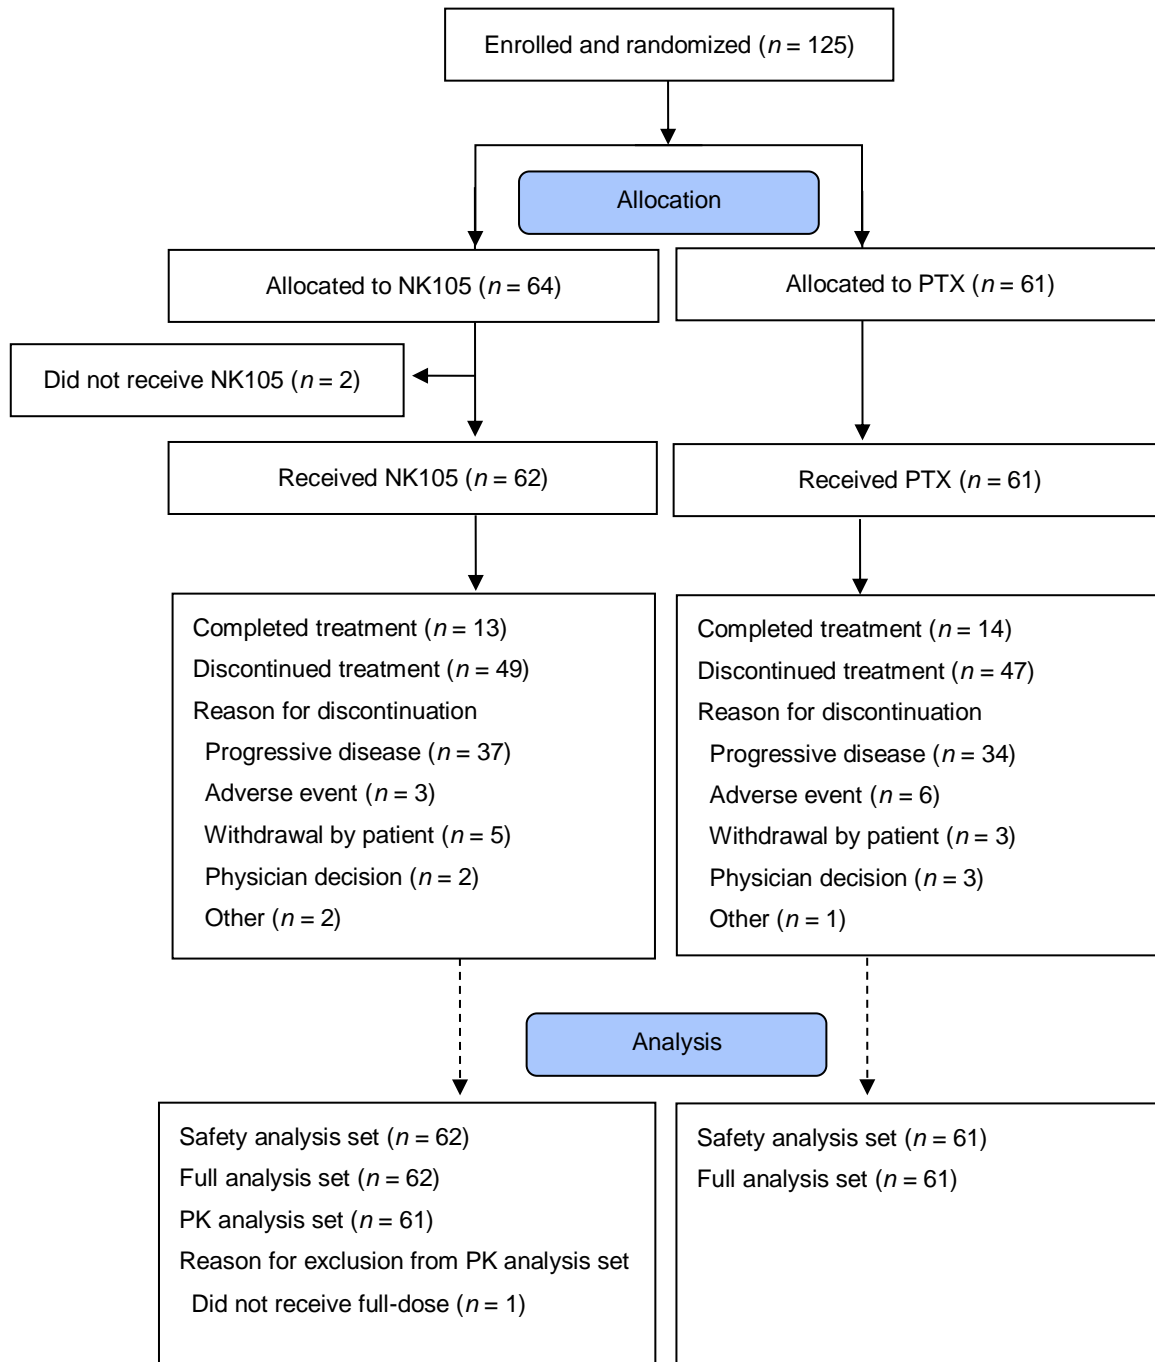

**Supplementary Figure 1** CONSORT flow diagram.

**Abbreviations:** PTX, paclitaxel.

Supplement: Supplementary file 1 [file Supplementary_Figure_1_CONSORT_flow_diagram.pdf › Supplementary_Figure_1_CONSORT_flow_diagram.pdf]
